# Supplementary material
Source: PubMed Central journal article supplement (PMC1253596)

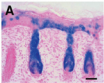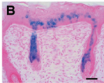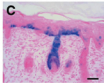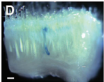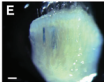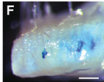

Supplement: pnas_0507250102_1.pdf [file pnas_0507250102_1.pdf]
